# Supplementary material for: Validation of Molecular Markers of Barley Net Blotch Resistance Loci on Chromosome 3H for Marker-Assisted Selection
Source: MDPI journal article supplement (doi:10.3390/agriculture12040439), 2022-03-22
Supplement: s1 [file s1]

## Supplementary Materials

### Validation of Molecular Markers of Barley Net Blotch Resistance Loci on Chromosome 3H for Marker-assisted Selection

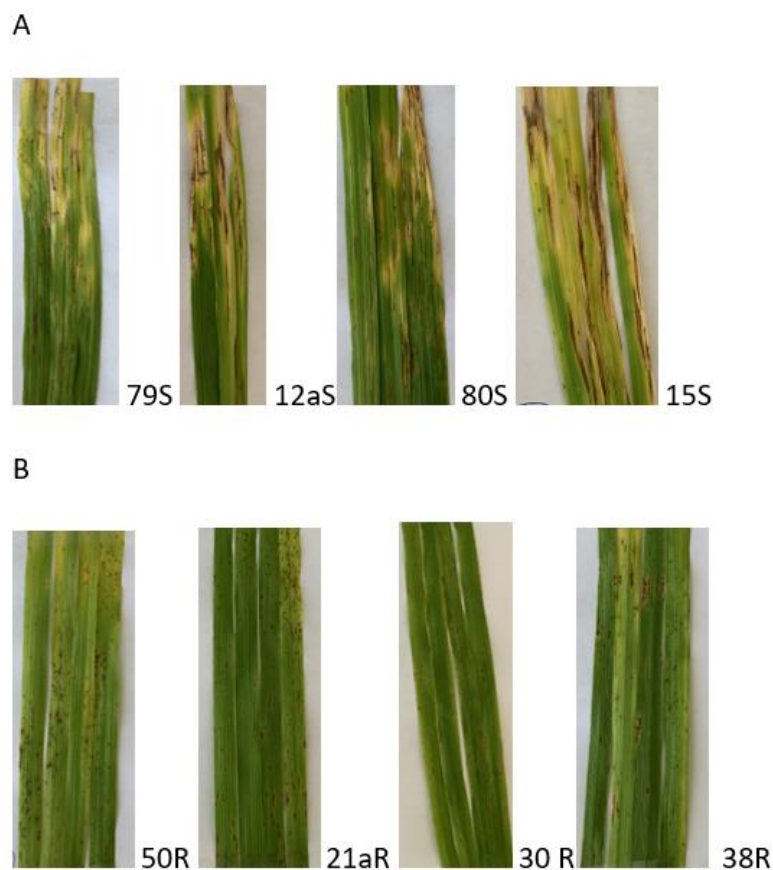

**Figure S1.** DH Lines CLS/Harrington 12 dpi with Ptt isolate F18 scored on the second leaf of the seedling. A – susceptible lines; B – resistant lines.

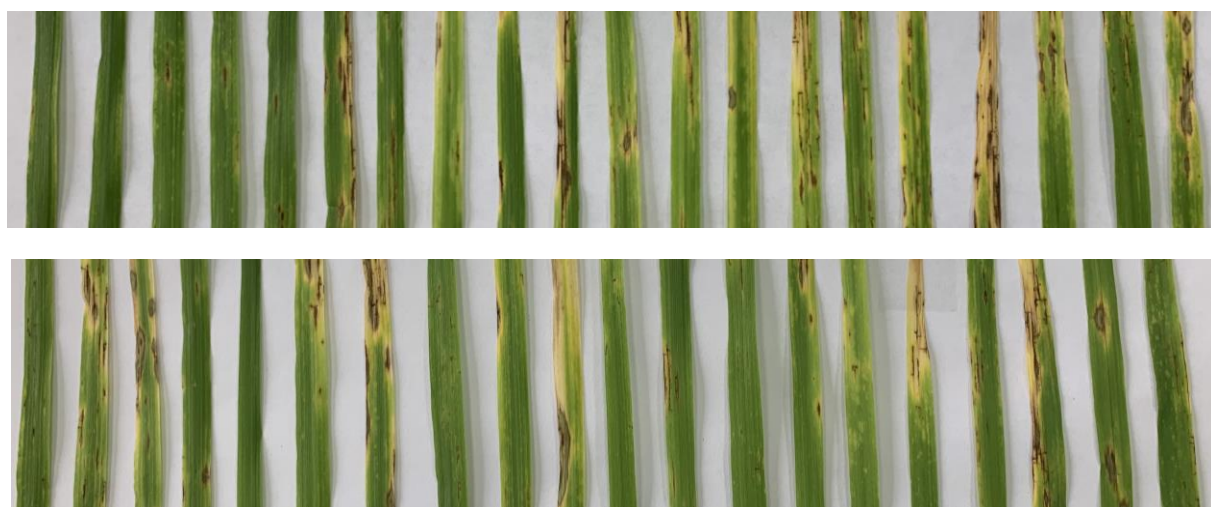

**Figure S2.** Segregation on resistance to Ptt isolate F18 12 dpi in F2 population Local k-21578/Gesine scored on the second leaf of the seedling.

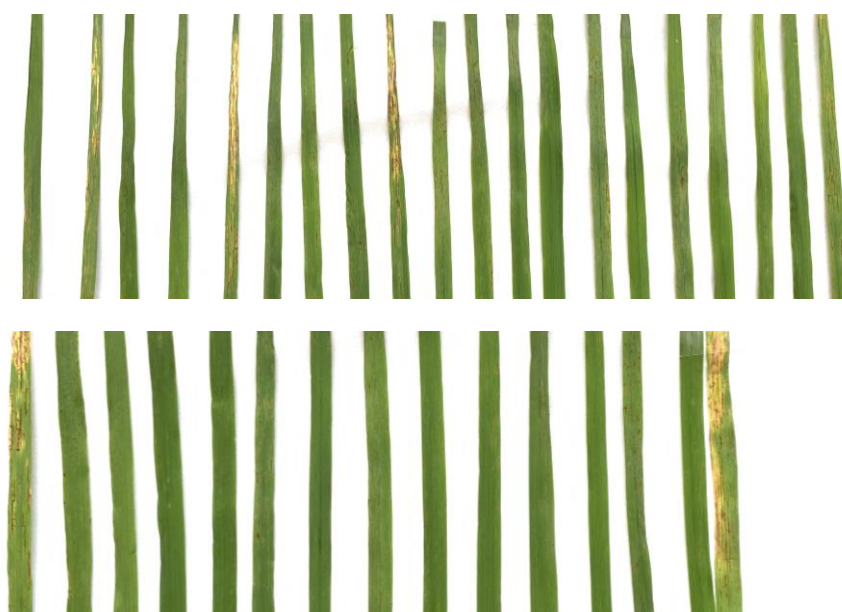

**Figure S3.** Segregation on resistance to Ptt isolate F18 12 dpi in F2 population Morex/Gesine scored on the second leaf of the seedling.

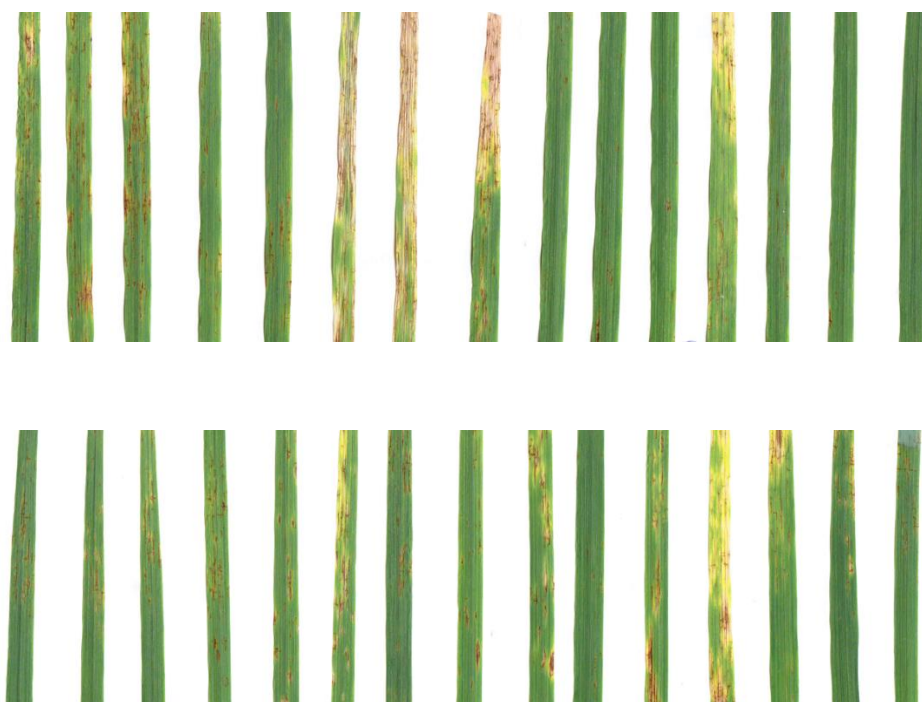

**Figure S4.** Segregation on resistance to Ptt isolate F18 12 dpi in F2 population Zolo/Gesine scored on the second leaf of the seedling.

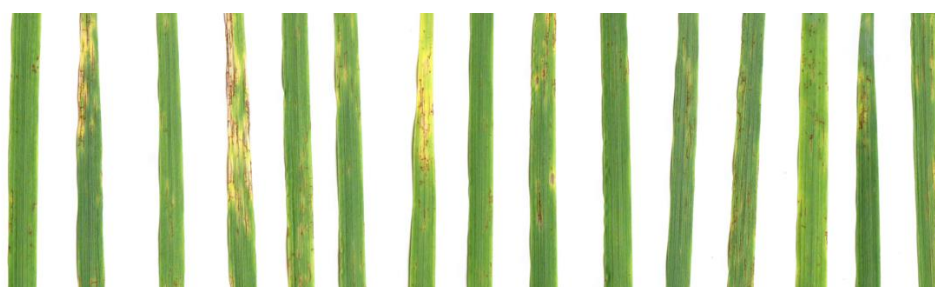

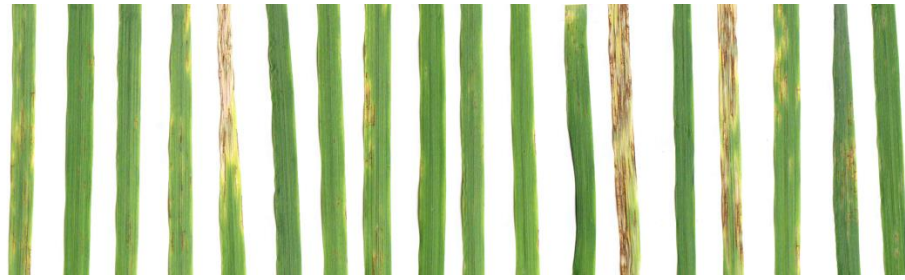

**Figure S5.** Segregation on resistance to Ptt isolate F18 12 dpi in F2 population Fox/Gesine scored on the second leaf of the seedling.

**Table S1.** KASP-genotyping results on DH and hybrid barley populations. Markers that have differentiated into resistant and susceptible DH lines, or hybrid plants are highlighted in **bold**.

**Table S1.1.** DH population Canadian Lake Shore/ Harrington.

| №  | SNP-marker                   | Position         |                   | Allele | Resistant plant | Susceptible plant |
|----|------------------------------|------------------|-------------------|--------|-----------------|-------------------|
|    |                              | Genetic map (cM) | Physical map (bp) |        |                 |                   |
| 1  | <b>JHI-Hv50k-2016-179690</b> | 51.63            | 389686103         | GG     | 20              | 0                 |
|    |                              |                  |                   | AG     | 0               | 0                 |
|    |                              |                  |                   | AA     | 0               | 21                |
| 2  | <b>Clone ID 3272635</b>      | 51.27            | 391906604         | GG     | 19              | 0                 |
|    |                              |                  |                   | CG     | 0               | 0                 |
|    |                              |                  |                   | CC     | 1               | 20                |
| 3  | <b>JHI-Hv50k-2016-183463</b> | 54.53            | 443119491         | CC     | 1               | 21                |
|    |                              |                  |                   | CT     | 0               | 0                 |
|    |                              |                  |                   | TT     | 19              | 0                 |
| 4  | <b>JHI-Hv50k-2016-183478</b> | 54.53            | 443111006         | CC     | 19              | 0                 |
|    |                              |                  |                   | CA     | 0               | 0                 |
|    |                              |                  |                   | AA     | 1               | 21                |
| 5  | <b>JHI-Hv50k-2016-183207</b> | 52.46            | 442203921         | TT     | 19              | 0                 |
|    |                              |                  |                   | TA     | 0               | 0                 |
|    |                              |                  |                   | AA     | 1               | 21                |
| 6  | <b>JHI-Hv50k-2016-164734</b> | 45.82            | 48713634          | CC     | 20              | 0                 |
|    |                              |                  |                   | CT     | 0               | 0                 |
|    |                              |                  |                   | TT     | 0               | 21                |
| 7  | <b>JHI-Hv50k-2016-165152</b> | 45.82            | 61409056          | CC     | 20              | 0                 |
|    |                              |                  |                   | CG     | 0               | 0                 |
|    |                              |                  |                   | GG     | 0               | 21                |
| 8  | JHI-Hv50k-2016-166356        | 47.31            | 102070302         | TT     | 19              | 21                |
|    |                              |                  |                   |        | 0               | 0                 |
|    |                              |                  |                   |        | 0               | 0                 |
| 9  | <b>JHI-Hv50k-2016-166392</b> | 47.1             | 112536071         | CC     | 0               | 21                |
|    |                              |                  |                   | TC     | 0               | 0                 |
|    |                              |                  |                   | TT     | 20              | 0                 |
| 10 | JHI-Hv50k-2016-173670        | 51.56            | 285191294         | TT     | 19              | 21                |
|    |                              |                  |                   |        | 0               | 0                 |
|    |                              |                  |                   |        | 0               | 0                 |
| 11 | JHI-Hv50k-2016-174303        | 51.56            | 301082623         | GG     | 19              | 21                |
|    |                              |                  |                   | AG     | 0               | 0                 |
|    |                              |                  |                   | AA     | 1               | 0                 |
| 12 | <b>JHI-Hv50k-2016-183351</b> | 54.53            | 442550473         | CC     | 1               | 21                |
|    |                              |                  |                   | CT     | 0               | 0                 |
|    |                              |                  |                   | TT     | 19              | 0                 |
| 13 | JHI-Hv50k-2016-202195        | 98.65            | 553150117         | CC     | 12              | 6                 |
|    |                              |                  |                   | CT     | 0               | 0                 |
|    |                              |                  |                   | TT     | 8               | 15                |

|    |                           |       |           |    |    |    |
|----|---------------------------|-------|-----------|----|----|----|
| 14 | <b>Clone ID 3255462_1</b> | 51.63 | 363531898 | GG | 19 | 0  |
|    |                           |       |           | AG | 0  | 0  |
|    |                           |       |           | AA | 1  | 21 |
|    |                           |       |           | CC | 1  | 21 |
| 15 | <b>Clone ID 3255462_2</b> | 51.63 | 363531871 | CT | 0  | 0  |
|    |                           |       |           | TT | 19 | 0  |

**Table S1.2.** Population F2 Fox x Gezine.

| №  | SNP-marker                   | Position         |                   | Allele | Resistant plant | Susceptible plant |
|----|------------------------------|------------------|-------------------|--------|-----------------|-------------------|
|    |                              | Genetic map (cM) | Physical map (bp) |        |                 |                   |
| 1  | JHI-Hv50k-2016-179690        | 51.63            | 389686103         | GG     | 0               | 4                 |
|    |                              |                  |                   | AG     | 6               | 0                 |
|    |                              |                  |                   | AA     | 13              | 14                |
|    |                              |                  |                   | GG     | 9               | 2                 |
| 2  | <b>Clone ID 3272635</b>      | 51.27            | 391906604         | CG     | 10              | 4                 |
|    |                              |                  |                   | CC     | 0               | 11                |
|    |                              |                  |                   | CC     | 0               | 12                |
|    |                              |                  |                   | CT     | 7               | 4                 |
| 3  | <b>JHI-Hv50k-2016-183463</b> | 54.53            | 443119491         | TT     | 9               | 2                 |
|    |                              |                  |                   | CC     | 10              | 2                 |
|    |                              |                  |                   | CA     | 9               | 4                 |
|    |                              |                  |                   | AA     | 0               | 12                |
| 4  | <b>JHI-Hv50k-2016-183478</b> | 54.53            | 443111006         | TT     | 10              | 1                 |
|    |                              |                  |                   | TA     | 8               | 4                 |
|    |                              |                  |                   | AA     | 0               | 12                |
|    |                              |                  |                   | CC     | 19              | 18                |
| 6  | JHI-Hv50k-2016-164734        | 45.82            | 48713634          | CT     | 0               | 0                 |
|    |                              |                  |                   | TT     | 0               | 0                 |
|    |                              |                  |                   | CC     | 19              | 17                |
|    |                              |                  |                   | CG     | 0               | 0                 |
| 7  | JHI-Hv50k-2016-165152        | 45.82            | 61409056          | GG     | 0               | 0                 |
|    |                              |                  |                   | TT     | 19              | 17                |
|    |                              |                  |                   | CC     | 0               | 0                 |
|    |                              |                  |                   | CC     | 0               | 8                 |
| 9  | JHI-Hv50k-2016-166392        | 47.1             | 112536071         | TC     | 4               | 4                 |
|    |                              |                  |                   | TT     | 15              | 6                 |
|    |                              |                  |                   | TT     | 19              | 18                |
|    |                              |                  |                   | TT     | 0               | 0                 |
| 10 | JHI-Hv50k-2016-173670        | 51.56            | 285191294         | GG     | 0               | 0                 |
|    |                              |                  |                   | AG     | 19              | 18                |
|    |                              |                  |                   | AA     | 0               | 0                 |
|    |                              |                  |                   | CC     | 0               | 12                |
| 12 | <b>JHI-Hv50k-2016-183351</b> | 54.53            | 442550473         | CT     | 9               | 4                 |
|    |                              |                  |                   | TT     | 10              | 2                 |
|    |                              |                  |                   | CC     | 19              | 17                |
|    |                              |                  |                   | CT     | 0               | 0                 |
| 13 | JHI-Hv50k-2016-202195        | 98.65            | 553150117         | TT     | 0               | 0                 |
|    |                              |                  |                   | GG     | 14              | 6                 |
|    |                              |                  |                   | AG     | 4               | 3                 |
|    |                              |                  |                   | AA     | 0               | 8                 |
| 14 | Clone ID 3255462_1           | 51.63            | 363531898         | CC     | 0               | 7                 |
|    |                              |                  |                   | CT     | 4               | 4                 |
|    |                              |                  |                   | TT     | 15              | 6                 |
|    |                              |                  |                   | TT     | 15              | 6                 |

**Table S1.3.** Population F2 Morex x Gezine.

| №  | SNP-marker                   | Position         |                   | Allele | Resistant plant | Susceptible plant |
|----|------------------------------|------------------|-------------------|--------|-----------------|-------------------|
|    |                              | Genetic map (cM) | Physical map (bp) |        |                 |                   |
| 1  | JHI-Hv50k-2016-179690        | 51.63            | 389686103         | GG     | 19              | 24                |
|    |                              |                  |                   | AG     | 0               | 0                 |
|    |                              |                  |                   | AA     | 0               | 1                 |
| 2  | <b>Clone ID 3272635</b>      | 51.27            | 391906604         | GG     | 6               | 1                 |
|    |                              |                  |                   | CG     | 11              | 4                 |
|    |                              |                  |                   | CC     | 2               | 19                |
| 3  | <b>JHI-Hv50k-2016-183463</b> | 54.53            | 443119491         | CC     | 2               | 18                |
|    |                              |                  |                   | CT     | 11              | 6                 |
|    |                              |                  |                   | TT     | 6               | 0                 |
| 4  | <b>JHI-Hv50k-2016-183478</b> | 54.53            | 443111006         | CC     | 6               | 0                 |
|    |                              |                  |                   | CA     | 11              | 6                 |
|    |                              |                  |                   | AA     | 2               | 19                |
| 5  | <b>JHI-Hv50k-2016-183207</b> | 52.46            | 442203921         | TT     | 6               | 0                 |
|    |                              |                  |                   | TA     | 11              | 5                 |
|    |                              |                  |                   | AA     | 2               | 20                |
| 6  | JHI-Hv50k-2016-164734        | 45.82            | 48713634          | CC     | 19              | 25                |
|    |                              |                  |                   | CT     | 0               | 0                 |
|    |                              |                  |                   | TT     | 0               | 0                 |
| 7  | JHI-Hv50k-2016-165152        | 45.82            | 61409056          | CC     | 19              | 25                |
|    |                              |                  |                   | CG     | 0               | 0                 |
|    |                              |                  |                   | GG     | 0               | 0                 |
| 8  | JHI-Hv50k-2016-166356        | 47.31            | 102070302         | TT     | 19              | 25                |
|    |                              |                  |                   |        | 0               | 0                 |
|    |                              |                  |                   |        | 0               | 0                 |
| 9  | JHI-Hv50k-2016-166392        | 47.1             | 112536071         | CC     | 0               | 1                 |
|    |                              |                  |                   | TC     | 1               | 0                 |
|    |                              |                  |                   | TT     | 18              | 24                |
| 10 | JHI-Hv50k-2016-173670        | 51.56            | 285191294         | TT     | 0               | 0                 |
|    |                              |                  |                   |        | 0               | 0                 |
|    |                              |                  |                   |        | 19              | 25                |
| 11 | JHI-Hv50k-2016-174303        | 51.56            | 301082623         | GG     | 19              | 25                |
|    |                              |                  |                   | AG     | 0               | 0                 |
|    |                              |                  |                   | AA     | 0               | 0                 |
| 12 | <b>JHI-Hv50k-2016-183351</b> | 54.53            | 442550473         | CC     | 2               | 20                |
|    |                              |                  |                   | CT     | 11              | 5                 |
|    |                              |                  |                   | TT     | 6               | 0                 |
| 13 | JHI-Hv50k-2016-202195        | 98.65            | 553150117         | CC     | 19              | 25                |
|    |                              |                  |                   | CT     | 0               | 0                 |
|    |                              |                  |                   | TT     | 0               | 0                 |
| 14 | Clone ID 3255462_1           | 51.63            | 363531898         | GG     | 18              | 24                |
|    |                              |                  |                   | AG     | 1               | 0                 |
|    |                              |                  |                   | AA     | 0               | 1                 |
| 15 | Clone ID 3255462_2           | 51.63            | 363531871         | CC     | 0               | 1                 |
|    |                              |                  |                   | CT     | 0               | 0                 |
|    |                              |                  |                   | TT     | 19              | 24                |

**Table S1. 4.** Population Zolo x Gezine.

| № | SNP-marker              | Position         |                   | Allele | Resistant plant | Susceptible plant |
|---|-------------------------|------------------|-------------------|--------|-----------------|-------------------|
|   |                         | Genetic map (cM) | Physical map (bp) |        |                 |                   |
| 1 | JHI-Hv50k-2016-179690   | 51.63            | 389686103         | GG     | 0               | 4                 |
|   |                         |                  |                   | AG     | 6               | 0                 |
|   |                         |                  |                   | AA     | 13              | 14                |
| 2 | <b>Clone ID 3272635</b> | 51.27            | 391906604         | GG     | 9               | 2                 |
|   |                         |                  |                   | CG     | 10              | 4                 |

|    |                              |       |           |    |    |    |
|----|------------------------------|-------|-----------|----|----|----|
| 3  | <b>JHI-Hv50k-2016-183463</b> | 54.53 | 443119491 | CC | 0  | 11 |
|    |                              |       |           | CC | 0  | 12 |
|    |                              |       |           | CT | 7  | 4  |
|    |                              |       |           | TT | 9  | 2  |
| 4  | <b>JHI-Hv50k-2016-183478</b> | 54.53 | 443111006 | CC | 10 | 2  |
|    |                              |       |           | CA | 9  | 4  |
|    |                              |       |           | AA | 0  | 12 |
| 5  | <b>JHI-Hv50k-2016-183207</b> | 52.46 | 442203921 | TT | 10 | 1  |
|    |                              |       |           | TA | 8  | 4  |
|    |                              |       |           | AA | 0  | 12 |
|    |                              |       |           | CC | 19 | 18 |
| 6  | JHI-Hv50k-2016-164734        | 45.82 | 48713634  | CT | 0  | 0  |
|    |                              |       |           | TT | 0  | 0  |
|    |                              |       |           | CC | 19 | 17 |
| 7  | JHI-Hv50k-2016-165152        | 45.82 | 61409056  | CG | 0  | 0  |
|    |                              |       |           | GG | 0  | 0  |
|    |                              |       |           | TT | 19 | 17 |
| 8  | JHI-Hv50k-2016-166356        | 47.31 | 102070302 |    | 0  | 0  |
|    |                              |       |           |    | 0  | 0  |
|    |                              |       |           | CC | 0  | 8  |
| 9  | JHI-Hv50k-2016-166392        | 47.1  | 112536071 | TC | 4  | 4  |
|    |                              |       |           | TT | 15 | 6  |
|    |                              |       |           | TT | 19 | 18 |
| 10 | JHI-Hv50k-2016-173670        | 51.56 | 285191294 |    | 0  | 0  |
|    |                              |       |           |    | 0  | 0  |
|    |                              |       |           | GG | 19 | 18 |
| 11 | JHI-Hv50k-2016-174303        | 51.56 | 301082623 | AG | 0  | 0  |
|    |                              |       |           | AA | 0  | 0  |
|    |                              |       |           | CC | 0  | 12 |
| 12 | <b>JHI-Hv50k-2016-183351</b> | 54.53 | 442550473 | CT | 9  | 4  |
|    |                              |       |           | TT | 10 | 2  |
|    |                              |       |           | CC | 19 | 17 |
| 13 | JHI-Hv50k-2016-202195        | 98.65 | 553150117 | CT | 0  | 0  |
|    |                              |       |           | TT | 0  | 0  |
|    |                              |       |           | GG | 14 | 6  |
| 14 | Clone ID 3255462_1           | 51.63 | 363531898 | AG | 4  | 3  |
|    |                              |       |           | AA | 0  | 8  |
|    |                              |       |           | CC | 0  | 7  |
| 15 | Clone ID 3255462_2           | 51.63 | 363531871 | CT | 4  | 4  |
|    |                              |       |           | TT | 15 | 6  |

**Table S1.5.** Population Local (k-21578) x Gezine.

| № | SNP-marker                   | Position         |                   | Allele | Resistant plant | Susceptible plant |
|---|------------------------------|------------------|-------------------|--------|-----------------|-------------------|
|   |                              | Genetic map (cM) | Physical map (bp) |        |                 |                   |
| 1 | <b>JHI-Hv50k-2016-179690</b> | 51.63            | 389686103         | GG     | 18              | 0                 |
|   |                              |                  |                   | AG     | 1               | 8                 |
|   |                              |                  |                   | AA     | 1               | 9                 |
|   |                              |                  |                   | GG     | 0               | 0                 |
| 2 | Clone ID 3272635             | 51.27            | 391906604         | CG     | 0               | 0                 |
|   |                              |                  |                   | CC     | 20              | 18                |
|   |                              |                  |                   | CC     | 1               | 11                |
| 3 | <b>JHI-Hv50k-2016-183463</b> | 54.53            | 443119491         | CT     | 10              | 7                 |
|   |                              |                  |                   | TT     | 9               | 0                 |
|   |                              |                  |                   | CC     | 9               | 0                 |
| 4 | <b>JHI-Hv50k-2016-183478</b> | 54.53            | 443111006         | CA     | 10              | 7                 |
|   |                              |                  |                   | AA     | 1               | 11                |
|   |                              |                  |                   | TT     | 9               | 0                 |
| 5 | <b>JHI-Hv50k-2016-183207</b> | 52.46            | 442203921         | TA     | 10              | 7                 |

|    |                              |       |           |    |    |    |
|----|------------------------------|-------|-----------|----|----|----|
| 6  | JHI-Hv50k-2016-164734        | 45.82 | 48713634  | AA | 1  | 11 |
|    |                              |       |           | CC | 20 | 18 |
|    |                              |       |           | CT | 0  | 0  |
|    |                              |       |           | TT | 0  | 0  |
| 7  | JHI-Hv50k-2016-165152        | 45.82 | 61409056  | CC | 20 | 18 |
|    |                              |       |           | CG | 0  | 0  |
|    |                              |       |           | GG | 0  | 0  |
|    |                              |       |           | TT | 20 | 18 |
| 8  | JHI-Hv50k-2016-166356        | 47.31 | 102070302 |    | 0  | 0  |
|    |                              |       |           |    | 0  | 0  |
|    |                              |       |           | CC | 1  | 10 |
|    |                              |       |           | TC | 1  | 8  |
| 9  | <b>JHI-Hv50k-2016-166392</b> | 47.1  | 112536071 | TT | 18 | 0  |
|    |                              |       |           | TT | 0  | 0  |
|    |                              |       |           |    | 0  | 0  |
|    |                              |       |           |    | 19 | 18 |
| 10 | JHI-Hv50k-2016-173670        | 51.56 | 285191294 | GG | 1  | 10 |
|    |                              |       |           | AG | 10 | 8  |
|    |                              |       |           | AA | 9  | 0  |
|    |                              |       |           | CC | 1  | 11 |
| 11 | <b>JHI-Hv50k-2016-174303</b> | 51.56 | 301082623 | CT | 10 | 7  |
|    |                              |       |           | TT | 9  | 0  |
|    |                              |       |           | CC | 20 | 18 |
|    |                              |       |           | CT | 0  | 0  |
| 12 | <b>JHI-Hv50k-2016-183351</b> | 54.53 | 442550473 | TT | 0  | 0  |
|    |                              |       |           | CC | 20 | 18 |
|    |                              |       |           | CT | 0  | 0  |
|    |                              |       |           | TT | 0  | 0  |
| 13 | JHI-Hv50k-2016-202195        | 98.65 | 553150117 | GG | 18 | 0  |
|    |                              |       |           | AG | 1  | 8  |
|    |                              |       |           | AA | 1  | 10 |
|    |                              |       |           | CC | 1  | 10 |
| 14 | Clone ID 3255462_1           | 51.63 | 363531898 | CT | 1  | 8  |
|    |                              |       |           | TT | 18 | 0  |
| 15 | Clone ID 3255462_2           | 51.63 | 363531871 |    |    |    |
|    |                              |       |           |    |    |    |
|    |                              |       |           |    |    |    |
|    |                              |       |           |    |    |    |

**Table S2.** Allele-specific PCR markers of the QTL localized on chromosome 3H.

| SNP                                | Allele | Position  | Primers                                                                  |
|------------------------------------|--------|-----------|--------------------------------------------------------------------------|
| Clone ID 3272635<br>(635)          | G/C    | 391906604 | Clone ID 3272635-F<br>5'CGGGAGCCTAAGAAGAGGGGTATAAC <b>C</b> - 3'         |
|                                    |        |           | Clone ID 3272635-R<br>5' GGCATAATGGGTTTTGCTTATTTTATAGACGAC 3'            |
|                                    |        |           |                                                                          |
|                                    |        |           |                                                                          |
| JHI-Hv50k-2016-<br>165152<br>(152) | G/C    | 61409056  | JHI-Hv50k-2016-165152 F<br>5' - GGTCATCTCCGTTCTTCTTTTCTTTTAC <b>C</b> 3' |
|                                    |        |           | JHI-Hv50k-2016-165152-R<br>5' CCATCAGTTCAGGCAGCAGTGAC - 3'               |
|                                    |        |           |                                                                          |
|                                    |        |           |                                                                          |
| JHI-Hv50k-2016-<br>166356<br>(356) | A/C    | 102070302 | JHI-Hv50k-2016-166356-F<br>5' GCAGACTCCATTGCTTGTGATTTGTGAG 3'            |
|                                    |        |           | JHI-Hv50k-2016-166356-R<br>5' CCAGGCACGGATCTTTTATAGTAGTCA <b>A</b> 3'    |
|                                    |        |           |                                                                          |
|                                    |        |           |                                                                          |
| JHI-Hv50k-2016-<br>183207<br>(207) | A/T    | 442203921 | JHI-Hv50k-2016-183207-F<br>5' CAAAGAAAGTATTATTTCCATTGGTGGTGC 3'          |
|                                    |        |           | JHI-Hv50k-2016-183207-R<br>5' CAGATTATTATGCAAATGCTGGAGCAAGT <b>T</b> 3'  |
|                                    |        |           |                                                                          |
|                                    |        |           |                                                                          |
| JHI-Hv50k-2016-<br>183478<br>(478) | C/A    | 443111006 | JHI-Hv50k-2016-183478-F<br>5' GGTTCTTCTGATGTGTTTGTCTTCTACCA <b>C</b> 3'  |
|                                    |        |           | JHI-Hv50k-2016-183478-R<br>5' GTATTCCTGCCTCTATAACAGTTCTGG 3'             |
|                                    |        |           |                                                                          |
|                                    |        |           |                                                                          |
| JHI-Hv50k-2016-<br>183463<br>(463) | T/C    | 443119491 | JHI-Hv50k-2016-183463-F<br>5'GTGCCAAATTGTATAAGCCATATCATGTTTTTTT3'        |
|                                    |        |           | 5'GTGCCAAATTGTATAAGCCATATCATGTTTTTTTC3'                                  |
|                                    |        |           | JHI-Hv50k-2016-183463-R                                                  |
|                                    |        |           | 5' TACACAACACGGGAGGGAGGG 3'                                              |

|                       |     |           |                                         |
|-----------------------|-----|-----------|-----------------------------------------|
|                       |     |           | JHI-Hv50k-2016-183351-F                 |
| JHI-Hv50k-2016-183351 | T/C | 442550473 | 5' GCATGAGAAGATATTTGAATGATGACATTTGCT 3' |
| (351)                 |     |           | 5' GCATGAGAAGATATTTGAATGATGACATTTGCC 3' |
|                       |     |           | JHI-Hv50k-2016-183351-R                 |
|                       |     |           | 5' CTTATATGTTGGCTTCGCATCTCGCAG 3'       |

**Table S3.** Resistance of barley genotypes to *Ptt* and data of molecular marker analysis.

| N                 | Barley genotype                    | Number of cata-log VIR | IR       | Clone ID 3272635 | JHI-Hv50k-2016-183463 | JHI-Hv50k-2016-183351 | JHI-Hv50k-2016-183478 |
|-------------------|------------------------------------|------------------------|----------|------------------|-----------------------|-----------------------|-----------------------|
| 1                 | Gesine Germany                     | -                      | 9.5 (S)  | -                | -                     | -                     | -                     |
| 2                 | Harrington, TR 306 Canada          | -                      | 9.7 (S)  | -                | -                     | -                     | -                     |
| 3                 | Local Turkey                       | 7689                   | 5.6 (MR) | +                | +                     | -                     | +                     |
| 4                 | S-328 Mexico                       | 28671                  | 6.9 (MR) | +                | +                     | +                     | +                     |
| 5                 | Morex (C.I.15773) USA              | 26959                  | 2.6 (R)  | +                | +                     | -                     | +                     |
| 6                 | Fox (C.I.9190, NFC 883) USA        | 19182                  | 3.1 (R)  | +                | +                     | +                     | +                     |
| 7                 | Zolo Morocco                       | 18552                  | 3.2 (R)  | +                | +                     | +                     | +                     |
| 8                 | Local Ecuador                      | 21578                  | 4.1 (R)  | -                | -                     | +                     | +                     |
| 9                 | Harbin C.I. 4929 USA               | 19282                  | 3.5 (R)  | +                | +                     | +                     | +                     |
| 10                | C.I. 2750, Canadian Lake Shore USA | 25282                  | 2.6 (R)  | +                | +                     | +                     | +                     |
| Conditions of PCR |                                    |                        |          | 68°C             | 68°C                  | 68°C                  | 64°C                  |

Resistance groups: R — resistant, MR — moderately resistant, S — susceptible. «+» — fragment presents, «-» — fragment absents.

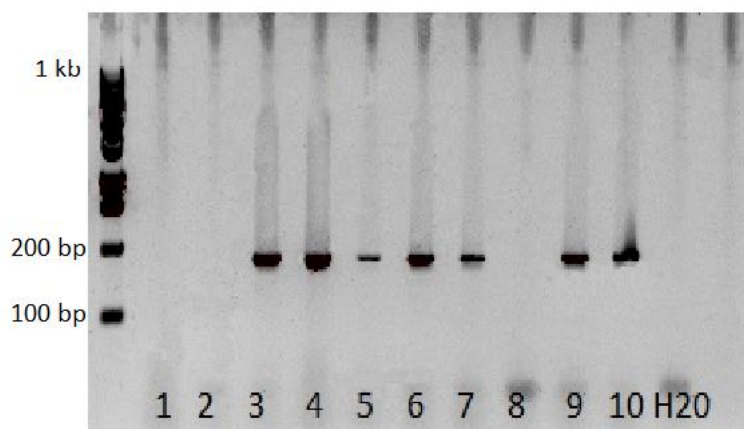

**Figure S6.** Results of PCR with primer 635 (marker Clone ID 3272635). Annealing temperature 68°C. Lines 1, 2 - Gesine, Harrington; 3 - Local Turkey k-7689, 4 - Local S-28, Mexico; 5 - Morex; 6 - Fox; 7 - Zolo; 8 - Local k-21578; 9 - Harbin, 10 - CLS. .



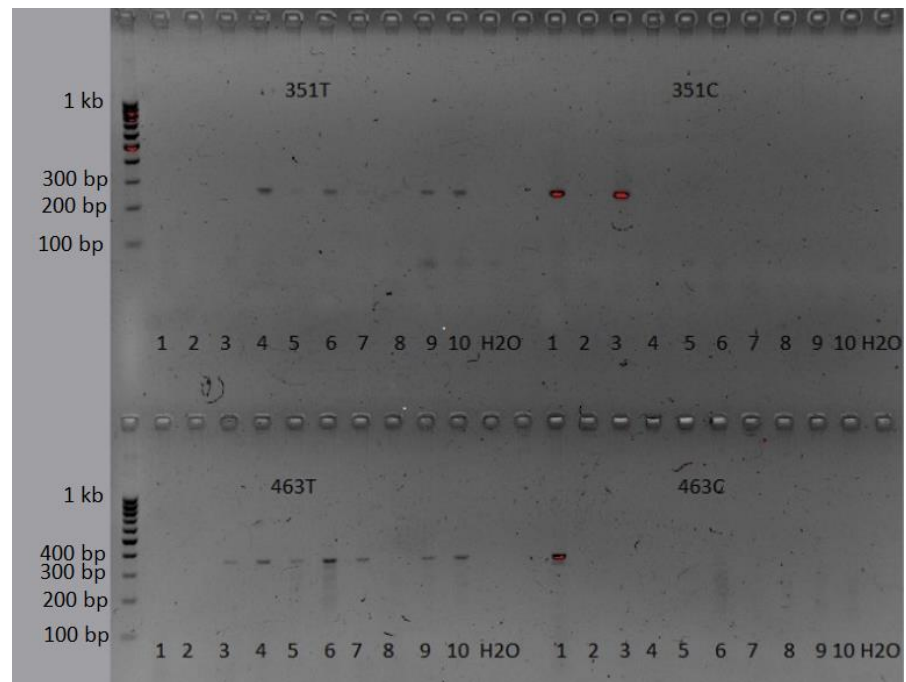

**Figure S7.** Results of PCR with primer 351 (marker JHI-Hv50k-2016-183351), haplotypes T/C and with primer 463 (marker JHI-Hv50k-2016-183463), haplotypes T/G. Annealing temperature 68°C. Lines 1, 2 - Gezine, Harrington; 3 - Local Turkey k-7689, 4 - Local S-28, Mexico; 5 - Morex; 6 - Fox; 7 - Zolo; 8 - Local k-21578; 9 - Harbin, 10 - CLS. .

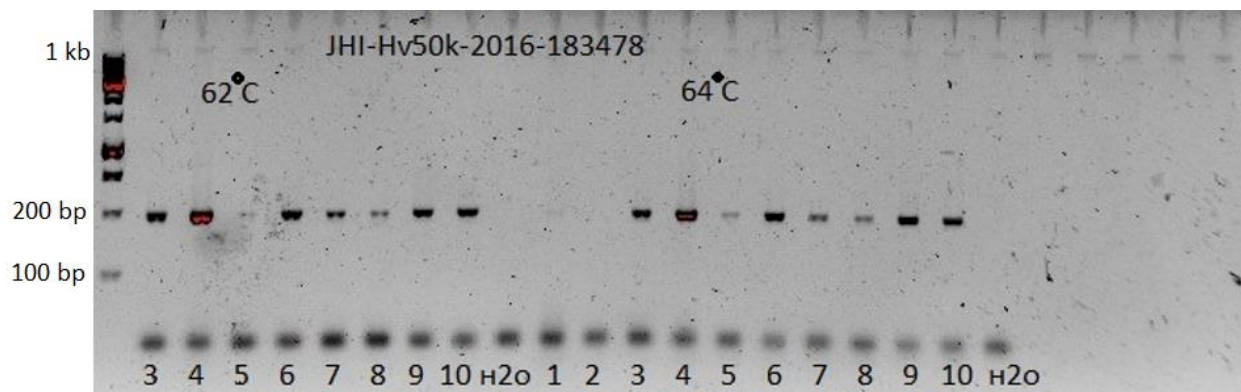

**Figure S8.** Results of PCR with primer 478 (marker JHI-Hv50k-2016-183478) with different annealing temperature. Lines 1, 2 - Gezine, Harrington; 3 - Local Turkey k-7689, 4 - Local S-28, Mexico; 5 - Morex; 6 - Fox; 7 - Zolo; 8 - Local k-21578; 9 - Harbin, 10 - CLS. .

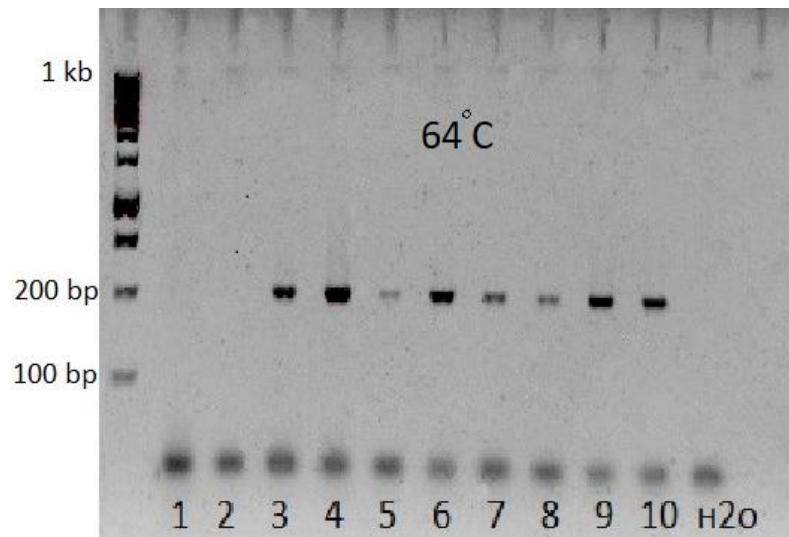

**Figure S9.** Results of PCR with primer 478 (marker JHI-Hv50k-2016-183478). Lines 1, 2 - Gezine, Harrington; 3 - Local Turkey k-7689, 4 - Local S-28, Mexico; 5 - Morex; 6 - Fox; 7 - Zolo; 8 - Local k-21578; 9 - Harbin, 10 - CLS. .

**Table S4.** Genes detected within 150 kb of the markers.

| Gene                      | Start     | End       | Strand | Protein product                                                |
|---------------------------|-----------|-----------|--------|----------------------------------------------------------------|
| HORVU.MOREX.r3.3HG0236960 | 48677067  | 48677558  | +      | Retrotransposon protein, putative, unclassified                |
| HORVU.MOREX.r3.3HG0236970 | 48711607  | 48714029  | +      | Pentatricopeptide repeat-containing protein                    |
| HORVU.MOREX.r3.3HG0236980 | 48715271  | 48715573  | +      | serine carboxypeptidase-like protein                           |
| HORVU.MOREX.r3.3HG0236990 | 48799820  | 48801829  | +      | Retrovirus-related Pol polyprotein from transposon TNT 1-94    |
| HORVU.MOREX.r3.3HG0237000 | 48833008  | 48845918  | -      |                                                                |
| HORVU.MOREX.r3.3HG0238880 | 61236366  | 61236990  | +      | LURP-one-like protein                                          |
| HORVU.MOREX.r3.3HG0238890 | 61241142  | 61242203  | +      | Formate-dependent phosphoribosyl-glycinamide formyltransferase |
| HORVU.MOREX.r3.3HG0238900 | 61242769  | 61244391  | +      | Retrotransposon protein, putative, unclassified                |
| HORVU.MOREX.r3.3HG0238910 | 61245109  | 61245552  | +      | Retrotransposon protein, putative, unclassified                |
| HORVU.MOREX.r3.3HG0238920 | 61245657  | 61246424  | +      | Retrotransposon protein, putative, unclassified                |
| HORVU.MOREX.r3.3HG0238930 | 61246569  | 61247012  | +      | LINE-1 reverse transcriptase                                   |
| HORVU.MOREX.r3.3HG0238940 | 61247636  | 61248241  | +      | Dihydroorotate dehydrogenase (quinone)                         |
| HORVU.MOREX.r3.3HG0238950 | 61249609  | 61249986  | -      | Cellulose synthase                                             |
| HORVU.MOREX.r3.3HG0238960 | 61409080  | 61411432  | -      | DUF581 family protein                                          |
| HORVU.MOREX.r3.3HG0246070 | 112377399 | 112378299 | +      | plant/protein (Protein of unknown function, DUF538)            |
| HORVU.MOREX.r3.3HG0246080 | 112536266 | 112537417 | +      | plant/protein (Protein of unknown function, DUF538)            |
| HORVU.MOREX.r3.3HG0246090 | 112545595 | 112545939 | +      | B-block-binding subunit of TFIIC protein                       |
| HORVU.MOREX.r3.3HG0265210 | 301082037 | 301085955 | -      | Tudor/PWWP/MBT superfamily protein                             |
| HORVU.MOREX.r3.3HG0265220 | 301617534 | 301617923 | +      | ABC transporter C family member 5                              |
| HORVU.MOREX.r3.3HG0265230 | 301676118 | 301676420 | -      | <b>Leucine-rich repeat protein kinase family protein</b>       |
| HORVU.MOREX.r3.3HG0265240 | 301677916 | 301678215 | -      | <b>Leucine-rich repeat protein kinase</b>                      |

|                           |           |           |   | <b>family protein</b>                                                |
|---------------------------|-----------|-----------|---|----------------------------------------------------------------------|
| HORVU.MOREX.r3.3HG0265250 | 301678278 | 301678526 | - | Cytochrome b                                                         |
| HORVU.MOREX.r3.3HG0265260 | 301881962 | 301883566 | - | Capsule polysaccharide modification protein LipA                     |
| HORVU.MOREX.r3.3HG0271520 | 363571520 | 363572113 | + | Retrotransposon protein, putative, unclassified                      |
| HORVU.MOREX.r3.3HG0271510 | 363563999 | 363564301 | + | Retrovirus-related Pol polyprotein from transposon TNT 1-94          |
| HORVU.MOREX.r3.3HG0271530 | 363582046 | 363586052 | - | RNA binding protein                                                  |
| HORVU.MOREX.r3.3HG0274630 | 389485559 | 389488352 | - | Receptor-like kinase                                                 |
| HORVU.MOREX.r3.3HG0274640 | 389616921 | 389617353 | + | Serine/threonine protein phosphatase 7 long form isogeny             |
| HORVU.MOREX.r3.3HG0274650 | 389684780 | 389686164 | + | DUF1645 family protein                                               |
| HORVU.MOREX.r3.3HG0274660 | 389689450 | 389689764 | + | Ethylene-responsive transcription factor CRF1                        |
| HORVU.MOREX.r3.3HG0274670 | 389741871 | 389742961 | + | B3 domain-containing protein                                         |
| HORVU.MOREX.r3.3HG0274680 | 389747874 | 389752422 | + | Ulp1 protease family, C-terminal catalytic domain containing protein |
| HORVU.MOREX.r3.3HG0274690 | 389753252 | 389754374 | + | Ulp1 protease family, C-terminal catalytic domain containing protein |
| HORVU.MOREX.r3.3HG0274700 | 389754394 | 389755415 | + | Sentrin/sumo-specific protease, putative                             |
| HORVU.MOREX.r3.3HG0274710 | 389756181 | 389756732 | - | Protein FAR1-RELATED SEQUENCE 5                                      |
| HORVU.MOREX.r3.3HG0274720 | 389757099 | 389757623 | - | Protein FAR1-RELATED SEQUENCE 5                                      |
| HORVU.MOREX.r3.3HG0274730 | 389757939 | 389758391 | - | Protein FAR1-RELATED SEQUENCE 5                                      |
| HORVU.MOREX.r3.3HG0274740 | 389758813 | 389760395 | - | Protein FAR1-RELATED SEQUENCE 5                                      |
| HORVU.MOREX.r3.3HG0274750 | 389760518 | 389760871 | - | Membrane protein insertase YidC                                      |
| HORVU.MOREX.r3.3HG0274760 | 389761791 | 389762243 | + | Transposon protein Pong sub-class                                    |
| HORVU.MOREX.r3.3HG0274770 | 389764021 | 389764527 | + | Transposon protein, putative, Pong sub-class                         |
| HORVU.MOREX.r3.3HG0281310 | 442181350 | 442186240 | + | Receptor-like kinase                                                 |
| HORVU.MOREX.r3.3HG0281320 | 442194446 | 442195237 | + | Receptor-like kinase                                                 |
| HORVU.MOREX.r3.3HG0281330 | 442196573 | 442197603 | + | Kinase family protein                                                |
| HORVU.MOREX.r3.3HG0281340 | 442198250 | 442203897 | + | Receptor-like protein kinase                                         |
| HORVU.MOREX.r3.3HG0281350 | 442204330 | 442206675 | + | Protein kinase family protein                                        |
| HORVU.MOREX.r3.3HG0281360 | 442206893 | 442207453 | + | Zinc transporter ZIP10                                               |
| HORVU.MOREX.r3.3HG0281370 | 442208298 | 442208603 | - | Transposon protein, putative, Pong sub-class                         |
| HORVU.MOREX.r3.3HG0281380 | 442210294 | 442210986 | + | 50S ribosomal protein L7Ae                                           |
| HORVU.MOREX.r3.3HG0281390 | 442211590 | 442212897 | + | Reticulon-like protein                                               |
| HORVU.MOREX.r3.3HG0281400 | 442213272 | 442218020 | - | Phosphopantetheine adenylyltransferase                               |
| HORVU.MOREX.r3.3HG0281410 | 442352371 | 442352577 | - | kinesin like protein for actin based chloroplast movement 2          |
| HORVU.MOREX.r3.3HG0281420 | 442352819 | 442353157 | - | Multidrug resistance protein MdtC                                    |
| HORVU.MOREX.r3.3HG0281430 | 442543352 | 442552369 | + | DNA repair helicase                                                  |
| HORVU.MOREX.r3.3HG0281440 | 442553206 | 442560684 | + | Serine/threonine-protein phosphatase                                 |
| HORVU.MOREX.r3.3HG0281450 | 442562728 | 442562976 | - | Transposon protein, putative, Pong sub-class                         |
| HORVU.MOREX.r3.3HG0281460 | 442562992 | 442563453 | - | Transposon protein, putative, Pong sub-class                         |
| HORVU.MOREX.r3.3HG0281470 | 442564504 | 442564906 | + | Eukaryotic translation initiation factor 3 subunit A                 |
| HORVU.MOREX.r3.3HG0281480 | 442565698 | 442566123 | - | Translation initiation factor IF-2                                   |
| HORVU.MOREX.r3.3HG0281490 | 442645170 | 442645541 | + | Polycystic kidney disease and receptor for egg jelly-related protein |
| HORVU.MOREX.r3.3HG0281500 | 442861104 | 442862152 | - | Glutathione S-transferase                                            |
| HORVU.MOREX.r3.3HG0281510 | 442908345 | 442910800 | + | Protein PLASTID MOVEMENT IM-PAIRED 2                                 |

|                           |           |           |   |                                                               |
|---------------------------|-----------|-----------|---|---------------------------------------------------------------|
| HORVU.MOREX.r3.3HG0281520 | 442929976 | 442931294 | + | Zinc knuckle family protein, expressed                        |
| HORVU.MOREX.r3.3HG0281530 | 443109143 | 443116099 | + | alpha/beta hydrolase family protein                           |
| HORVU.MOREX.r3.3HG0281540 | 443118553 | 443121983 | - | RING/U-box superfamily protein                                |
| HORVU.MOREX.r3.3HG0281550 | 443245009 | 443245743 | - | UDP-sugar pyrophosphorylase 1                                 |
| HORVU.MOREX.r3.3HG0281560 | 443247926 | 443248276 | - | Regulator of chromosome condensation<br>(RCC1) family protein |
| HORVU.MOREX.r3.3HG0281570 | 443248705 | 443249118 | - | NADH-quinone oxidoreductase subunit<br>A                      |
| HORVU.MOREX.r3.3HG0303500 | 553060090 | 553066049 | - | zinc finger CCCH domain protein                               |
| HORVU.MOREX.r3.3HG0303510 | 553144785 | 553146073 | + | Kinesin-like protein                                          |
| HORVU.MOREX.r3.3HG0303520 | 553149040 | 553150591 | + | 30S ribosomal protein S12                                     |
| HORVU.MOREX.r3.3HG0303530 | 553151840 | 553153270 | + | Nuclear transcription factor Y subunit B                      |
| HORVU.MOREX.r3.3HG0303540 | 553155057 | 553164050 | - | V-type proton ATPase subunit a                                |
| HORVU.MOREX.r3.3HG0303550 | 553194370 | 553196493 | + | DNA glycosylase                                               |
| HORVU.MOREX.r3.3HG0303560 | 553222296 | 553226671 | - | Interactor of constitutive active ROPs 2,<br>chloroplastic    |
| HORVU.MOREX.r3.3HG0303570 | 553264762 | 553265418 | - | Myb/SANT-like DNA-binding domain<br>protein                   |
| HORVU.MOREX.r3.3HG0303580 | 553265453 | 553265812 | - | proline-, glutamic acid/leucine-rich pro-<br>tein             |
| HORVU.MOREX.r3.3HG0303590 | 553285525 | 553289591 | + | Protein IQ-DOMAIN 1                                           |
